# Supplementary material for: Application of Droplet Digital PCR for Estimating Vector Copy Number States in Stem Cell Gene Therapy
Source: PubMed Central journal article supplement — Hum Gene Ther Methods. 2016 Oct 1;27(5):197–208. doi: 10.1089/hgtb.2016.059 (PMC5111482; doi:10.1089/hgtb.2016.059), 2016-10-01
Supplement: Supp_Fig1.pdf [file Supp_Fig1.pdf]

## Supplementary Data

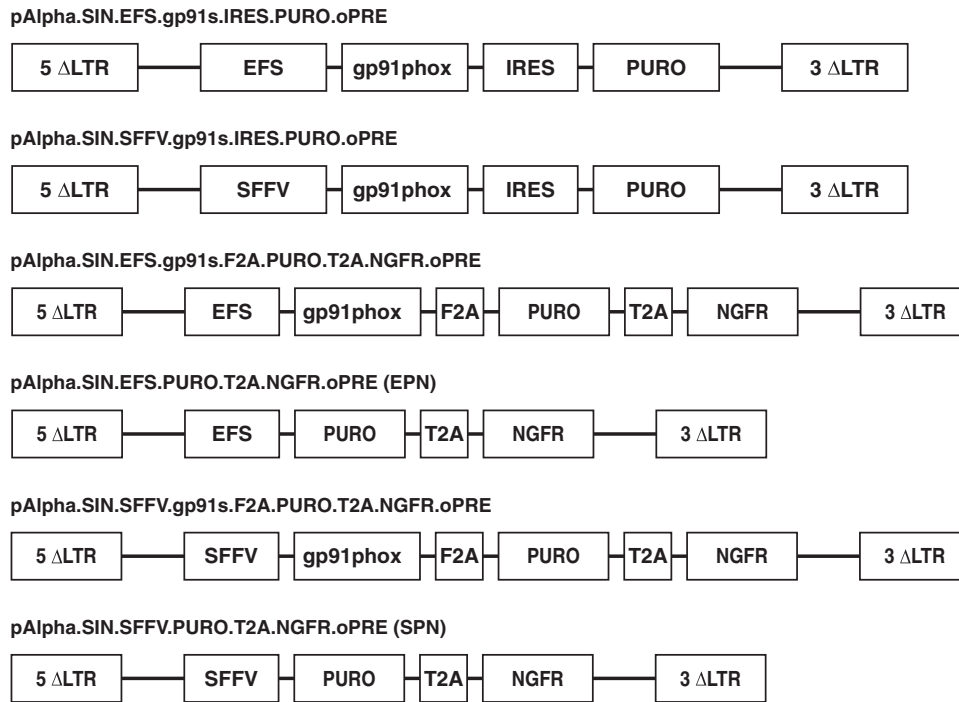

**Supplementary Figure S1.** Schematic representations of the vector constructs used in this study. Shown are proviruses originating from the same alpharetroviral vector backbone. “E” or “S” refers to the promoter (EFS or SFFV). “91,” “P,” and “N” refer to the transgenes *gp91<sup>phox</sup>*, *puromycin*, and *NGFR*, respectively.

---
