# Supplementary material for: Application of Droplet Digital PCR for Estimating Vector Copy Number States in Stem Cell Gene Therapy
Source: PubMed Central journal article supplement — Hum Gene Ther Methods. 2016 Oct 1;27(5):197–208. doi: 10.1089/hgtb.2016.059 (PMC5111482; doi:10.1089/hgtb.2016.059), 2016-10-01
Supplement: Supp_Fig2.pdf [file Supp_Fig2.pdf]

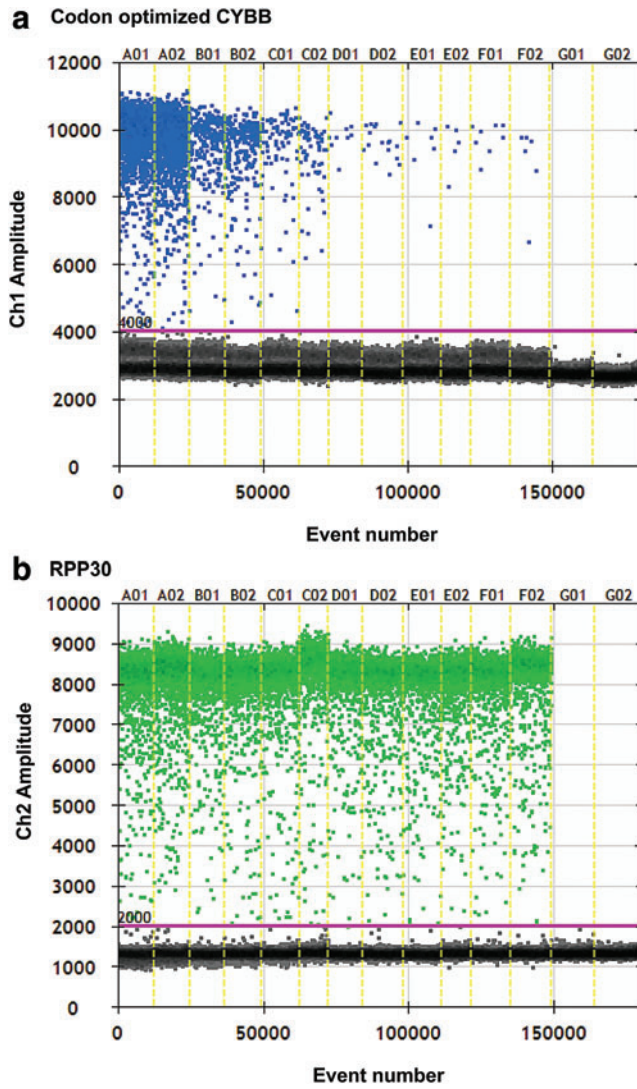

**Supplementary Figure S2.** Cellular dilution of template, using non-codon-optimized *CYBB*-containing gDNA. Template gDNA were diluted with non-codon-optimized *CYBB*-containing gDNA. **(a)** Blue dots indicate positive droplets for CO *CYBB*. **(b)** Green dots indicate positive droplets for *RPP30*. Black dots indicate negative droplets. Letters A to F indicate increasing fold dilutions (4 to 1024). The pink line represents the threshold for discriminating droplets.
