# Supplementary material for: Application of Droplet Digital PCR for Estimating Vector Copy Number States in Stem Cell Gene Therapy
Source: PubMed Central journal article supplement — Hum Gene Ther Methods. 2016 Oct 1;27(5):197–208. doi: 10.1089/hgtb.2016.059 (PMC5111482; doi:10.1089/hgtb.2016.059), 2016-10-01
Supplement: Supp_Fig4.pdf [file Supp_Fig4.pdf]

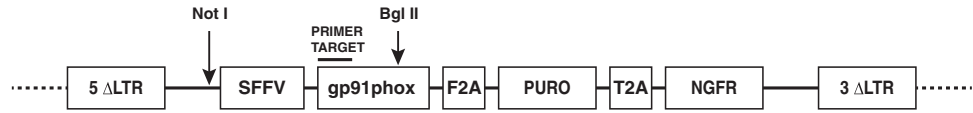

**Supplementary Figure S4.** Enzyme recognition sites for predigestion of genomic template. The S91PN1 XCGD-iPSC line consists of transduced cells carrying an estimated average of 6.75 copies of the provirus pAlpha.SIN.SFFV.gp91s.F2A.PURO.T2A.NGFR.oPRE. To enhance PCR amplification efficiency and to ensure each partitioned droplet contains only one copy of the target transgene, the genomic template was predigested with *NotI* and *BglII* (vertical downward arrows). Also shown is the primer recognition site (PRIMER TARGET), which remains intact after restriction enzyme digestion.

---
