# Supplementary material for: Application of Droplet Digital PCR for Estimating Vector Copy Number States in Stem Cell Gene Therapy
Source: PubMed Central journal article supplement — Hum Gene Ther Methods. 2016 Oct 1;27(5):197–208. doi: 10.1089/hgtb.2016.059 (PMC5111482; doi:10.1089/hgtb.2016.059), 2016-10-01
Supplement: Supp_Fig5.pdf [file Supp_Fig5.pdf]

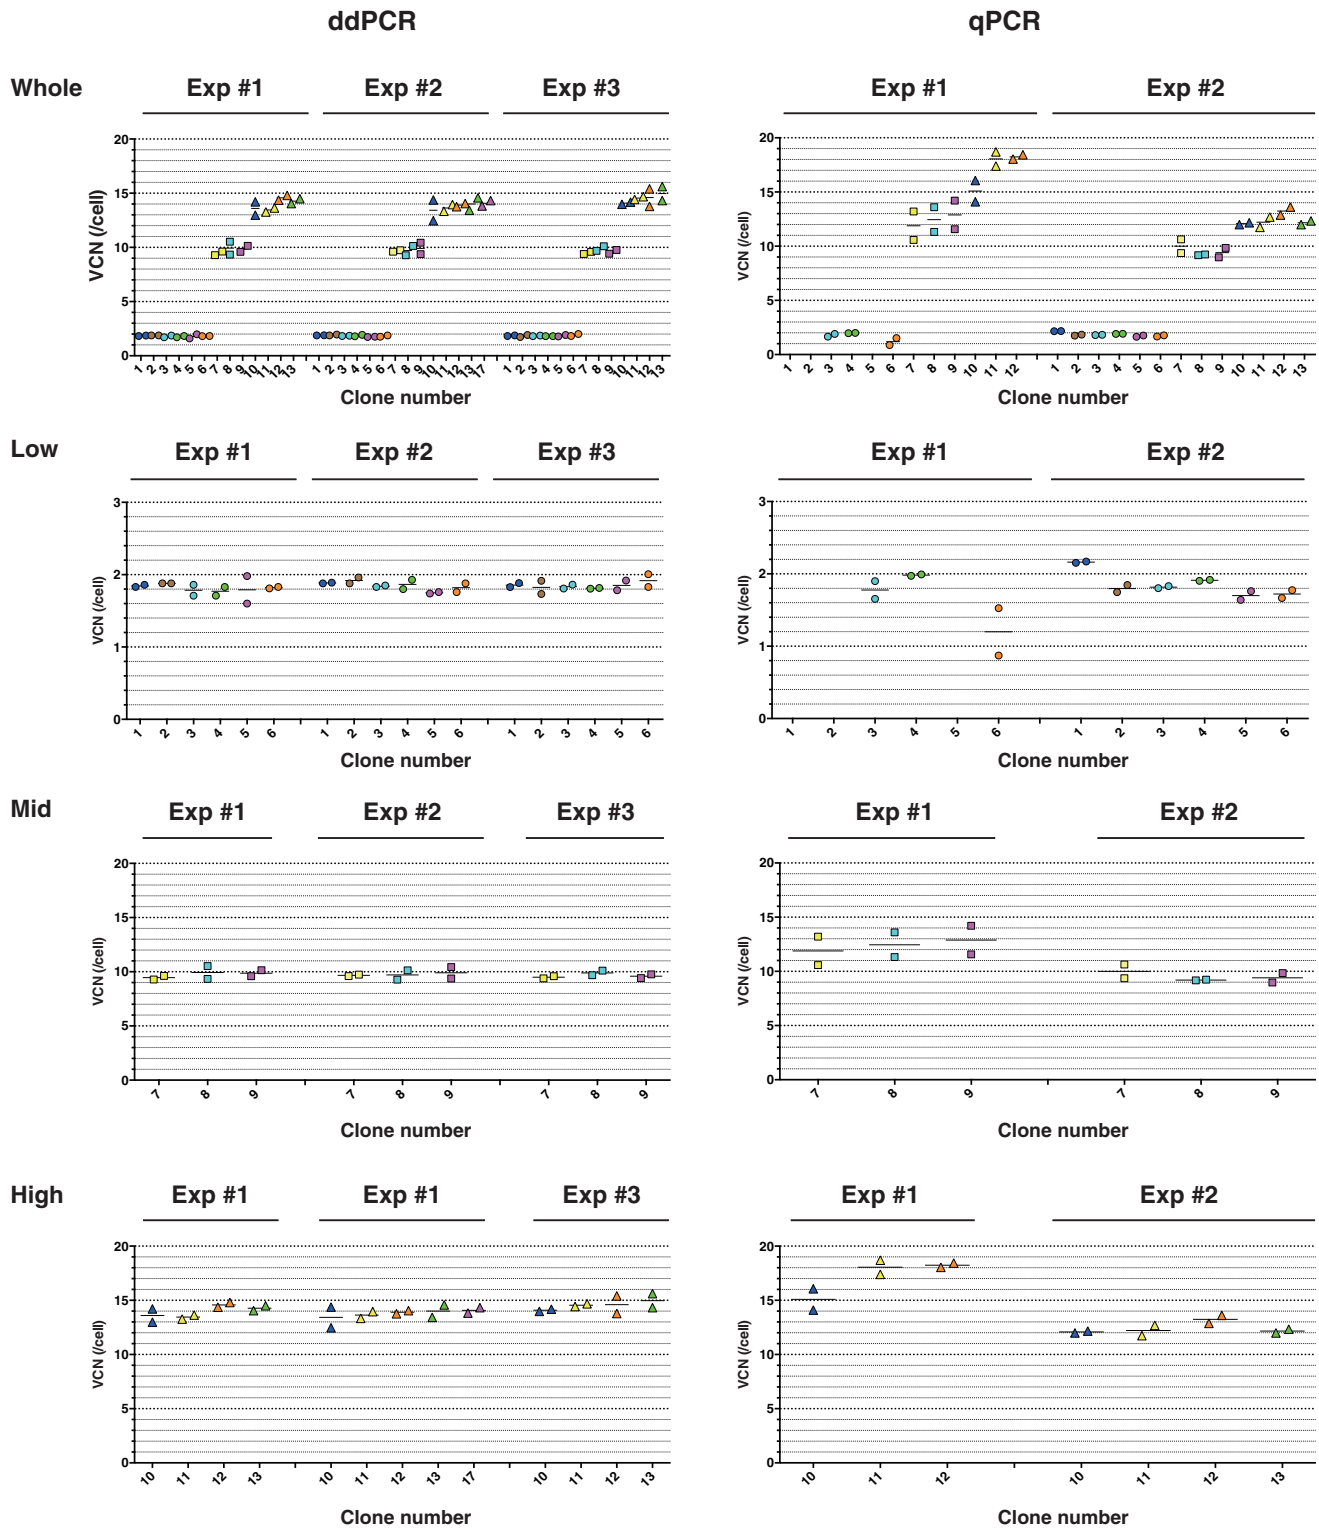

**Supplementary Figure S5.** Combined side-by-side comparison of VCN estimation between ddPCR and qPCR. Shown are the combined VCN estimation results obtained in this study by either ddPCR (three experiments) or qPCR (two experiments). Clones from the low, mid, or high categories were analyzed. Each clone is represented by the same-shaped symbol and color. Experiment names (ddPCR Exp #1–#3 and qPCR Exp #1 and #2) are the same as those shown in Supplementary Table S2.
