# Supplementary material for: Application of Droplet Digital PCR for Estimating Vector Copy Number States in Stem Cell Gene Therapy
Source: PubMed Central journal article supplement — Hum Gene Ther Methods. 2016 Oct 1;27(5):197–208. doi: 10.1089/hgtb.2016.059 (PMC5111482; doi:10.1089/hgtb.2016.059), 2016-10-01
Supplement: Supp_Table1.pdf [file Supp_Table1.pdf]

**Supplementary Table S1. Primer and probe sequences for TaqMan hydrolysis assays**

| <i>Gene</i>    | <i>Primer orientation</i> | <i>Primer sequence</i>      | <i>Probe sequence and structure</i> |
|----------------|---------------------------|-----------------------------|-------------------------------------|
| CO <i>CYBB</i> | F                         | 5'-CCTGAGCATCTTCGTGATCC-3'  | 5'-FAM-TGTGGCTG-3'                  |
|                | R                         | 5'-CGGTAGTACCACGAAACAGG-3'  |                                     |
| <i>PURO</i>    | F                         | 5'-TCACCGAGCTGCAAGAACTCT-3' | 5'-FAM-CCTCACGGCGTGC-3'             |
|                | R                         | 5'-CCCACACCTTGCCGCTGT-3'    |                                     |
| <i>RPP30</i>   | F                         | 5'-GATTGGACCTGCGAGCG-3'     | 5'-VIC-CTGACCTGAAGGCTCT-3'          |
|                | R                         | 5'-GCGGCTGTCTCCACAAGT-3'    |                                     |

CO *CYBB*, codon-optimized *CYBB* gene; F, forward; *PURO*, puromycin resistance gene; R, reverse; *RPP30*, ribonuclease P protein subunit p30 gene.
