# Supplementary material for: Application of Droplet Digital PCR for Estimating Vector Copy Number States in Stem Cell Gene Therapy
Source: PubMed Central journal article supplement — Hum Gene Ther Methods. 2016 Oct 1;27(5):197–208. doi: 10.1089/hgtb.2016.059 (PMC5111482; doi:10.1089/hgtb.2016.059), 2016-10-01
Supplement: Supp_Table2.pdf [file Supp_Table2.pdf]

**Supplementary Table S2.** Summary of vector copy number estimation of parental induced pluripotent stem cell samples and their derivative clones

| Clone number        | ddPCR  |        |        | qPCR   |        |       |
|---------------------|--------|--------|--------|--------|--------|-------|
|                     | Exp #1 | Exp #2 | Exp #3 | Exp #1 | Exp #2 |       |
| Parental bulk cells |        | 1.93   |        |        |        |       |
| E91P0.1             | 1      | 1.86   | 1.89   | 1.83   | ND     | 2.15  |
|                     |        | 1.83   | 1.88   | 1.88   | ND     | 2.17  |
|                     | 2      | 1.88   | 1.96   | 1.73   | ND     | 1.75  |
|                     |        | 1.88   | 1.88   | 1.92   | ND     | 1.85  |
|                     | 3      | 1.71   | 1.83   | 1.86   | 1.65   | 1.80  |
|                     |        | 1.86   | 1.85   | 1.81   | 1.90   | 1.83  |
|                     | 4      | 1.83   | 1.93   | 1.82   | 1.99   | 1.92  |
|                     |        | 1.71   | 1.80   | 1.81   | 1.97   | 1.90  |
|                     | 5      | 1.60   | 1.74   | 1.92   | ND     | 1.76  |
|                     |        | 1.98   | 1.76   | 1.78   | ND     | 1.64  |
|                     | 6      | 1.83   | 1.76   | 1.83   | 0.87   | 1.67  |
|                     |        | 1.81   | 1.88   | 2.01   | 1.53   | 1.77  |
| Parental bulk cells |        |        | 9.25   |        |        |       |
| E91P10              | 7      | 9.62   | 9.61   | 9.40   | 10.58  | 9.36  |
|                     |        | 9.29   | 9.74   | 9.59   | 13.20  | 10.64 |
|                     | 8      | 10.53  | 10.13  | 10.10  | 13.59  | 9.16  |
|                     |        | 9.34   | 9.28   | 9.68   | 11.31  | 9.23  |
|                     | 9      | 9.59   | 9.38   | 9.77   | 11.57  | 8.97  |
|                     |        | 10.15  | 10.43  | 9.42   | 14.20  | 9.84  |
| Parental bulk cells |        |        | 14.15  |        |        |       |
| S91P10              | 10     | 12.98  | 14.38  | 13.98  | 14.10  | 11.99 |
|                     |        | 14.21  | 12.47  | 14.18  | 16.07  | 12.16 |
|                     | 11     | 13.27  | 13.96  | 14.68  | 17.40  | 11.74 |
|                     |        | 13.64  | 13.33  | 14.42  | 18.71  | 12.69 |
|                     | 12     | 14.36  | 14.05  | 15.40  | 18.04  | 13.62 |
|                     |        | 14.80  | 13.76  | 13.79  | 18.44  | 12.87 |
|                     | 13     | 14.05  | 13.43  | 14.33  | ND     | 12.34 |
|                     |        | 14.49  | 14.58  | 15.61  | ND     | 11.99 |
|                     | 14     | 4.61   | 4.84   | ND     | ND     | ND    |
|                     |        | 4.59   | 4.50   | ND     | ND     | ND    |
|                     | 17     | ND     | 14.32  | ND     | ND     | ND    |
|                     |        | ND     | 13.82  | ND     | ND     | ND    |

ddPCR, droplet digital PCR; Exp, experiment; ND, not done; qPCR, real-time quantitative PCR.
