# Supplementary material for: Application of Droplet Digital PCR for Estimating Vector Copy Number States in Stem Cell Gene Therapy
Source: PubMed Central journal article supplement — Hum Gene Ther Methods. 2016 Oct 1;27(5):197–208. doi: 10.1089/hgtb.2016.059 (PMC5111482; doi:10.1089/hgtb.2016.059), 2016-10-01
Supplement: Supp_Table3.pdf [file Supp_Table3.pdf]

**Supplementary Table S3.** Comparison between droplet digital PCR and real-time quantitative PCR in vector copy number distribution of cloned induced pluripotent stem cells

| <i>Category</i> | <i>Experiment</i> | <i>Mean</i> | <i>SD</i> |
|-----------------|-------------------|-------------|-----------|
| Low VCN         | ddPCR (1)         | 1.83        | 0.06      |
|                 | ddPCR (2)         | 1.87        | 0.08      |
|                 | qPCR (1)          | 1.84        | 0.17      |
|                 | qPCR (2)          | 1.86        | 0.18      |
| Mid VCN         | ddPCR (1)         | 9.76        | 0.35      |
|                 | ddPCR (2)         | 9.56        | 0.13      |
|                 | qPCR (1)          | 9.17        | 0.20      |
|                 | qPCR (2)          | 9.90        | 0.71      |
| High VCN        | ddPCR (1)         | 14.60       | 0.61      |
|                 | ddPCR (2)         | 14.50       | 0.79      |
|                 | qPCR (1)          | 12.42       | 0.83      |
|                 | qPCR (2)          | 12.43       | 0.42      |

ddPCR, droplet digital PCR; qPCR, real-time quantitative PCR; VCN, vector copy number.
