# Supplementary material for: Application of Droplet Digital PCR for Estimating Vector Copy Number States in Stem Cell Gene Therapy
Source: PubMed Central journal article supplement — Hum Gene Ther Methods. 2016 Oct 1;27(5):197–208. doi: 10.1089/hgtb.2016.059 (PMC5111482; doi:10.1089/hgtb.2016.059), 2016-10-01
Supplement: Supp_Table4.pdf [file Supp_Table4.pdf]

**Supplementary Table S4.** *Statistical comparison between droplet digital PCR and real-time quantitative PCR in estimated vector copy number mean of cloned induced pluripotent stem cells*

| <i>VCN comparison</i> | <i>ddPCR (1) vs. ddPCR (2)</i> | <i>qPCR (1) vs. qPCR (2)</i> | <i>ddPCR (1) vs. qPCR (1)</i> | <i>ddPCR (1) vs. qPCR (2)</i> | <i>ddPCR (1) vs. qPCR (2)</i> | <i>ddPCR (2) vs. qPCR (2)</i> |
|-----------------------|--------------------------------|------------------------------|-------------------------------|-------------------------------|-------------------------------|-------------------------------|
| Low vs. low           | NS                             | NS                           | NS                            | NS                            | NS                            | NS                            |
| Mid vs. mid           | NS                             | NS                           | NS                            | NS                            | NS                            | NS                            |
| High vs. high         | NS                             | NS                           | ****a                         | ****a                         | ****a                         | ****a                         |

ddPCR, droplet digital PCR; NS, not significant; qPCR, real-time quantitative PCR; VCN, vector copy number.

\*\*\*\*a  $p < 0.0001$ .
